# Supplementary material for: Mechanistic computational modeling of monospecific and bispecific antibodies targeting interleukin-6/8 receptors
Source: PubMed Central journal article supplement (PMC11189202; doi:10.1371/journal.pcbi.1012157), 2024-06-07
Supplement: pcbi.1012157.s003.pdf [file pcbi.1012157.s003.pdf]

**S1 Table.** Original model parameters and their relationship to the simplified parameters after applying the model assumptions.

| Original            | Simplified    | Best Fit Value        | Units                                      |
|---------------------|---------------|-----------------------|--------------------------------------------|
| $k_{on,Toci-6R}$    | $k_{on,6R}$   | $5.92 \times 10^{-6}$ | $nM^{-1}s^{-1}$                            |
| $k_{on,Toci-6R^*}$  | $k_{on,6R^*}$ | $8.11 \times 10^{-8}$ | $\left(\frac{\#}{cell}\right)^{-1} s^{-1}$ |
| $k_{off,Toci-6R}$   | $k_{off,6R}$  | $5.61 \times 10^{-5}$ | $s^{-1}$                                   |
| $k_{off,Toci-6R^*}$ | $k_{off,6R}$  | $5.61 \times 10^{-5}$ | $s^{-1}$                                   |
| $k_{on,H2-8R}$      | $k_{on,8R}$   | $9.03 \times 10^{-6}$ | $nM^{-1}s^{-1}$                            |
| $k_{on,H2-8R^*}$    | $k_{on,8R^*}$ | $1.24 \times 10^{-7}$ | $\left(\frac{\#}{cell}\right)^{-1} s^{-1}$ |
| $k_{off,H2-8R}$     | $k_{off,8R}$  | $6.38 \times 10^{-5}$ | $s^{-1}$                                   |
| $k_{off,H2-8R^*}$   | $k_{off,8R}$  | $6.38 \times 10^{-5}$ | $s^{-1}$                                   |
| $k_{on,BS1-6R}$     | $k_{on,6R}$   | $5.92 \times 10^{-6}$ | $nM^{-1}s^{-1}$                            |
| $k_{on,BS1-8R}$     | $k_{on,8R}$   | $9.03 \times 10^{-6}$ | $nM^{-1}s^{-1}$                            |
| $k_{on,BS1-6R^*}$   | $k_{on,6R^*}$ | $8.11 \times 10^{-8}$ | $\left(\frac{\#}{cell}\right)^{-1} s^{-1}$ |
| $k_{on,BS1-8R^*}$   | $k_{on,8R^*}$ | $1.24 \times 10^{-7}$ | $\left(\frac{\#}{cell}\right)^{-1} s^{-1}$ |
| $k_{off,BS1-6R}$    | $k_{off,6R}$  | $5.61 \times 10^{-5}$ | $s^{-1}$                                   |
| $k_{off,BS1-8R}$    | $k_{off,8R}$  | $6.38 \times 10^{-5}$ | $s^{-1}$                                   |
| $k_{off,BS1-6R^*}$  | $k_{off,6R}$  | $5.61 \times 10^{-5}$ | $s^{-1}$                                   |
| $k_{off,BS1-8R^*}$  | $k_{off,8R}$  | $6.38 \times 10^{-5}$ | $s^{-1}$                                   |
