# Supplementary material for: Mechanistic computational modeling of monospecific and bispecific antibodies targeting interleukin-6/8 receptors
Source: PubMed Central journal article supplement (PMC11189202; doi:10.1371/journal.pcbi.1012157), 2024-06-07
Supplement: pcbi.1012157.s004.pdf [file pcbi.1012157.s004.pdf]

**S2 Table.** *IL-6R and IL-8R binding affinities for the monospecific and bispecific antibodies calculated directly from in vitro HEK 293T cell surface binding assays. Values are given as dissociation constants ( $K_D$ ) in nM and were originally reported by Yang et al (1).*

|             | IL-6R <sup>+</sup> / IL-8R <sup>-</sup> | IL-6R <sup>-</sup> / IL-8R <sup>+</sup> | IL-6R <sup>+</sup> / IL-8R <sup>+</sup> |
|-------------|-----------------------------------------|-----------------------------------------|-----------------------------------------|
| Tocilizumab | 3.1                                     | N/A                                     | 3.1                                     |
| 10H2        | N/A                                     | 3.6                                     | 4.1                                     |
| BS1         | 24                                      | 10                                      | 14                                      |

## Reference

1. Yang H, Karl MN, Wang W, Starich B, Tan H, Kiemen A, et al. Engineered bispecific antibodies targeting the interleukin-6 and -8 receptors potently inhibit cancer cell migration and tumor metastasis. *Mol Ther* 2022;30(11):3430–3449. doi: 10.1016/j.ymthe.2022.07.008.
