# Supplementary material for: Mechanistic computational modeling of monospecific and bispecific antibodies targeting interleukin-6/8 receptors
Source: PubMed Central journal article supplement (PMC11189202; doi:10.1371/journal.pcbi.1012157), 2024-06-07
Supplement: pcbi.1012157.s006.pdf [file pcbi.1012157.s006.pdf]

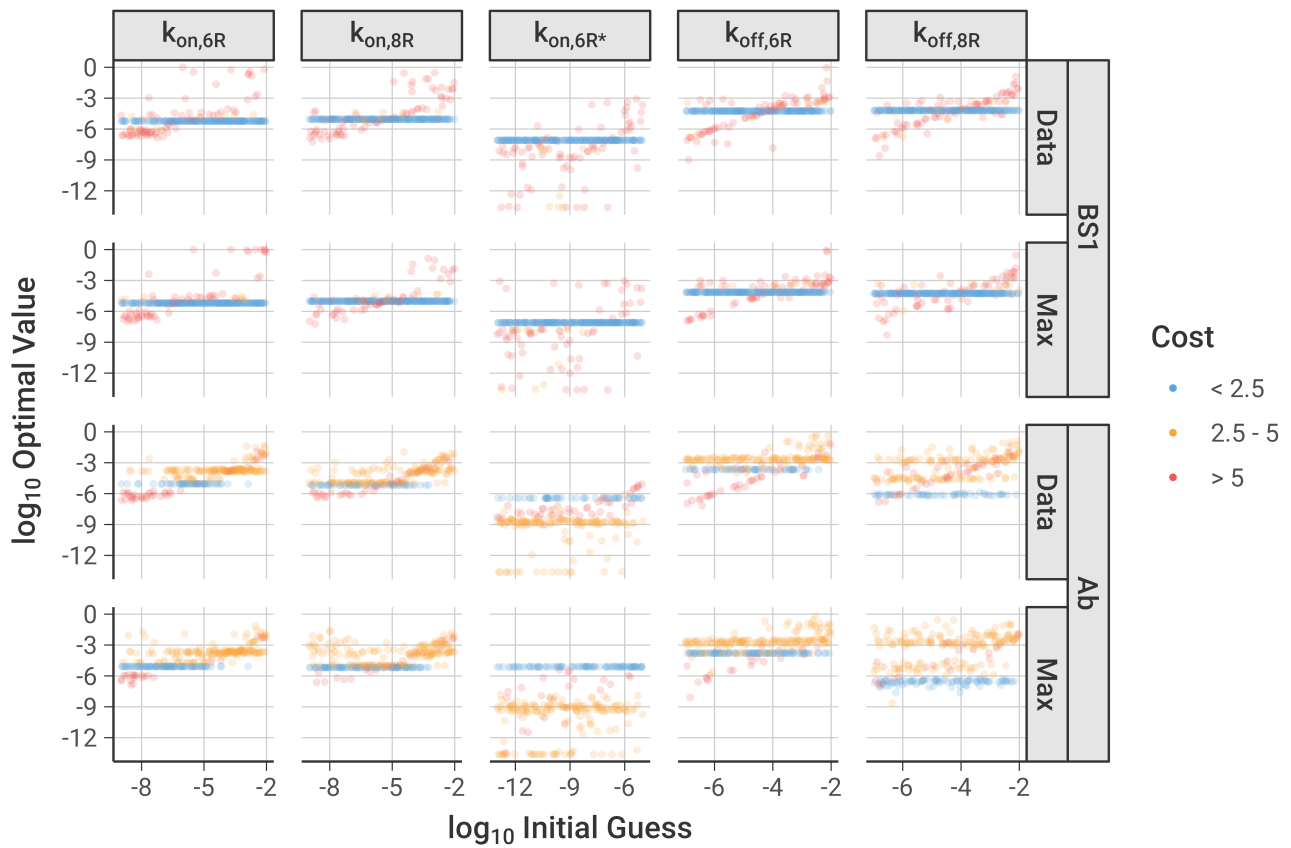

**S2 Fig. Relationship between initial guesses and optimized values for each binding reaction rate constant, separated by normalization options used. *BS1* describes simulations that were normalized against the concentration of bound BS1 at the end time point, and *Ab* indicates simulations that were normalized against the concentration of that specific antibody at the end time point. *Data* depicts simulations that were normalized using the bound concentrations at the binding saturation, as was done for the experimental data, and *Max* describes simulations that were normalized using the bound concentration at the maximum initial antibody concentration.**
