# Supplementary material for: Mechanistic computational modeling of monospecific and bispecific antibodies targeting interleukin-6/8 receptors
Source: PubMed Central journal article supplement (PMC11189202; doi:10.1371/journal.pcbi.1012157), 2024-06-07
Supplement: pcbi.1012157.s007.pdf [file pcbi.1012157.s007.pdf]

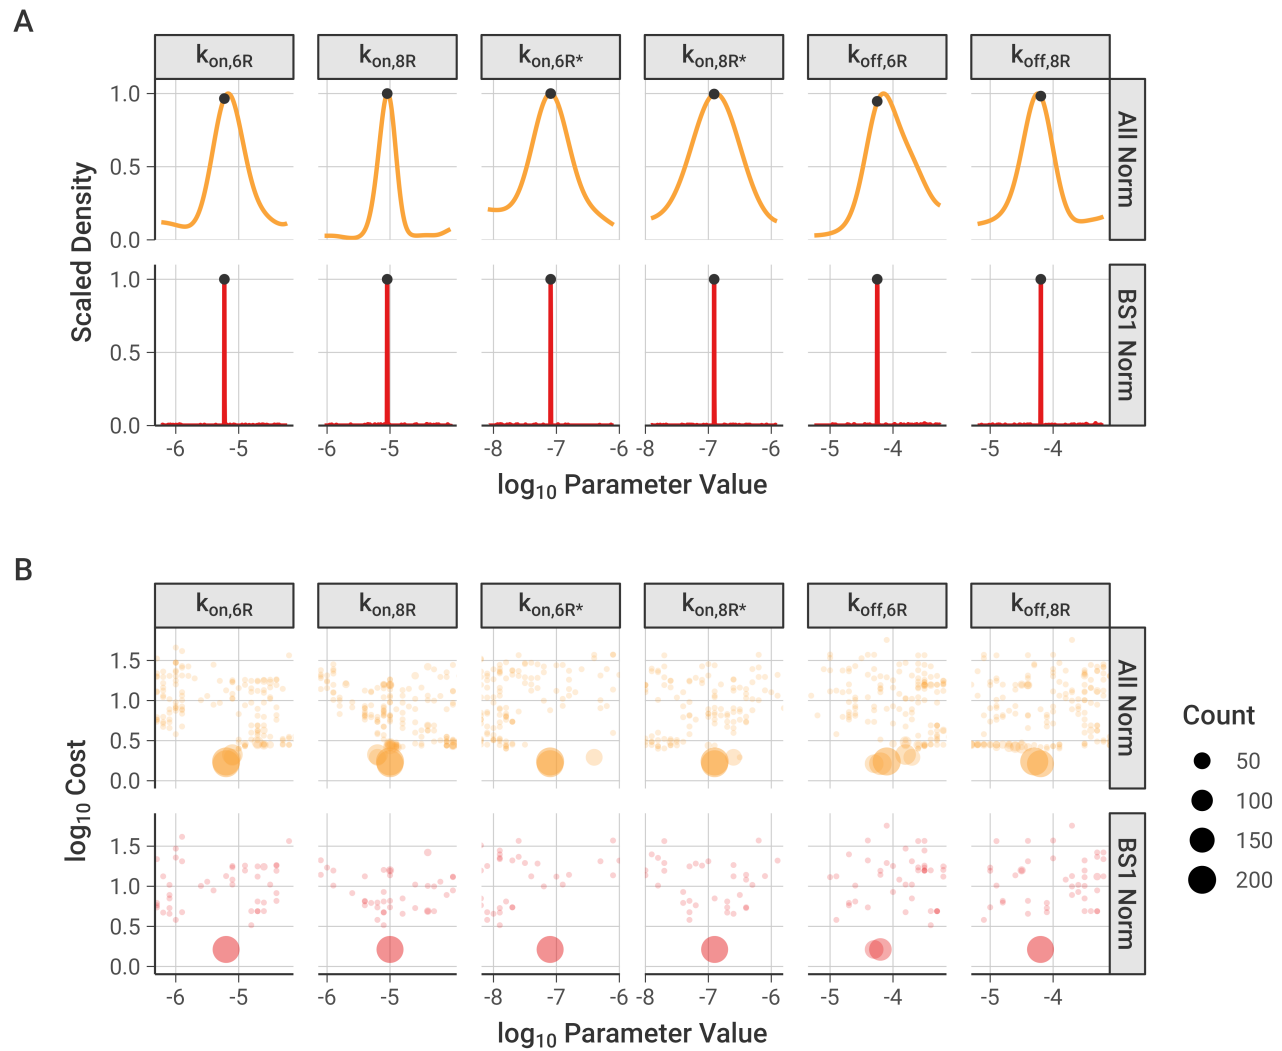

**S3 Fig. Frequency and cost of optimized binding model parameter sets, showing a limited range of values around the lowest-cost parameter set.** To better visualize the distribution of the parameter sets, the plotted values are limited to one order of magnitude above and below the values from the lowest cost parameter set [Table 2]. **A**, Distribution of optimized parameter values across all optimizations performed, with marked points indicating the values of the lowest cost parameter set. **B**, Relationship between optimized parameter values and the cost of the optimized parameter sets compared to experimental data, separated by parameter. Optimized points with the same value are grouped into a single point, with the point size indicating how many optimized parameter values are in the group.
