# Supplementary material for: Mechanistic computational modeling of monospecific and bispecific antibodies targeting interleukin-6/8 receptors
Source: PubMed Central journal article supplement (PMC11189202; doi:10.1371/journal.pcbi.1012157), 2024-06-07
Supplement: pcbi.1012157.s012.pdf [file pcbi.1012157.s012.pdf]

A

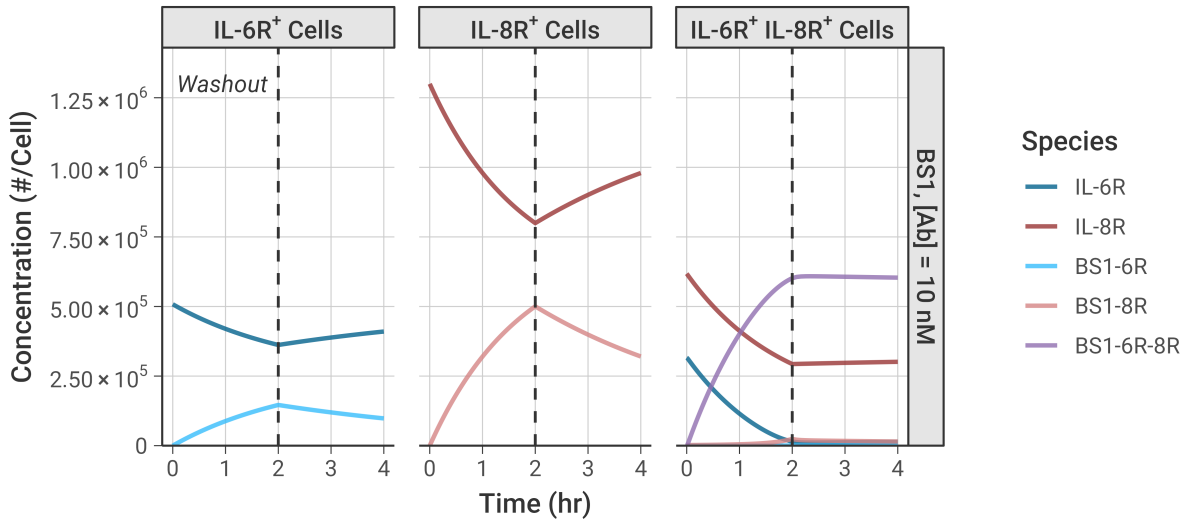

B

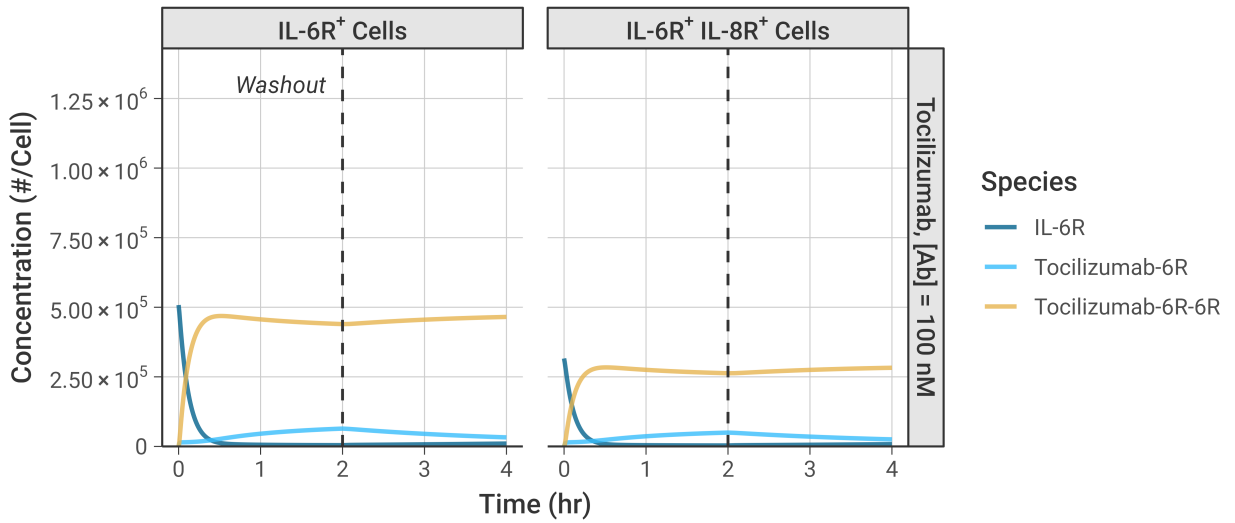

C

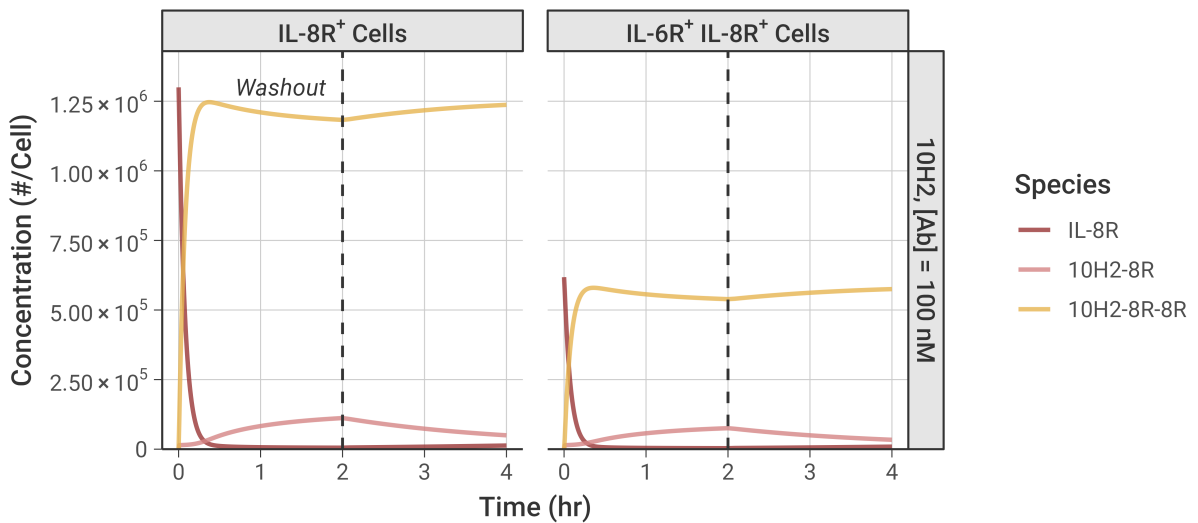

**S8 Fig. Simulations quantify bivalent antibody binding to IL-6R and IL-8R over time.** Cell number =  $1 \times 10^5$  for all simulations. Free antibody concentration was set to 0 nM at 2 hours to simulate antibody washout from the system. The expressions of IL-6R and IL-8R from the transduced experimental cell lines were used in the simulations [Table 1]. **A**, Simulations with an initial BS1 concentration of 10 nM, compared to the simulations with 100 nM of BS1 shown in the main text [Fig 4]. **B**, Simulations of tocilizumab at an initial concentration of 100 nM in the IL-6R<sup>+</sup> cell lines. **C**, Simulations of 10H2 at an initial concentration of 100 nM in the IL-8R<sup>+</sup> cell lines.
