# Supplementary material for: Mechanistic computational modeling of monospecific and bispecific antibodies targeting interleukin-6/8 receptors
Source: PubMed Central journal article supplement (PMC11189202; doi:10.1371/journal.pcbi.1012157), 2024-06-07
Supplement: pcbi.1012157.s017.pdf [file pcbi.1012157.s017.pdf]

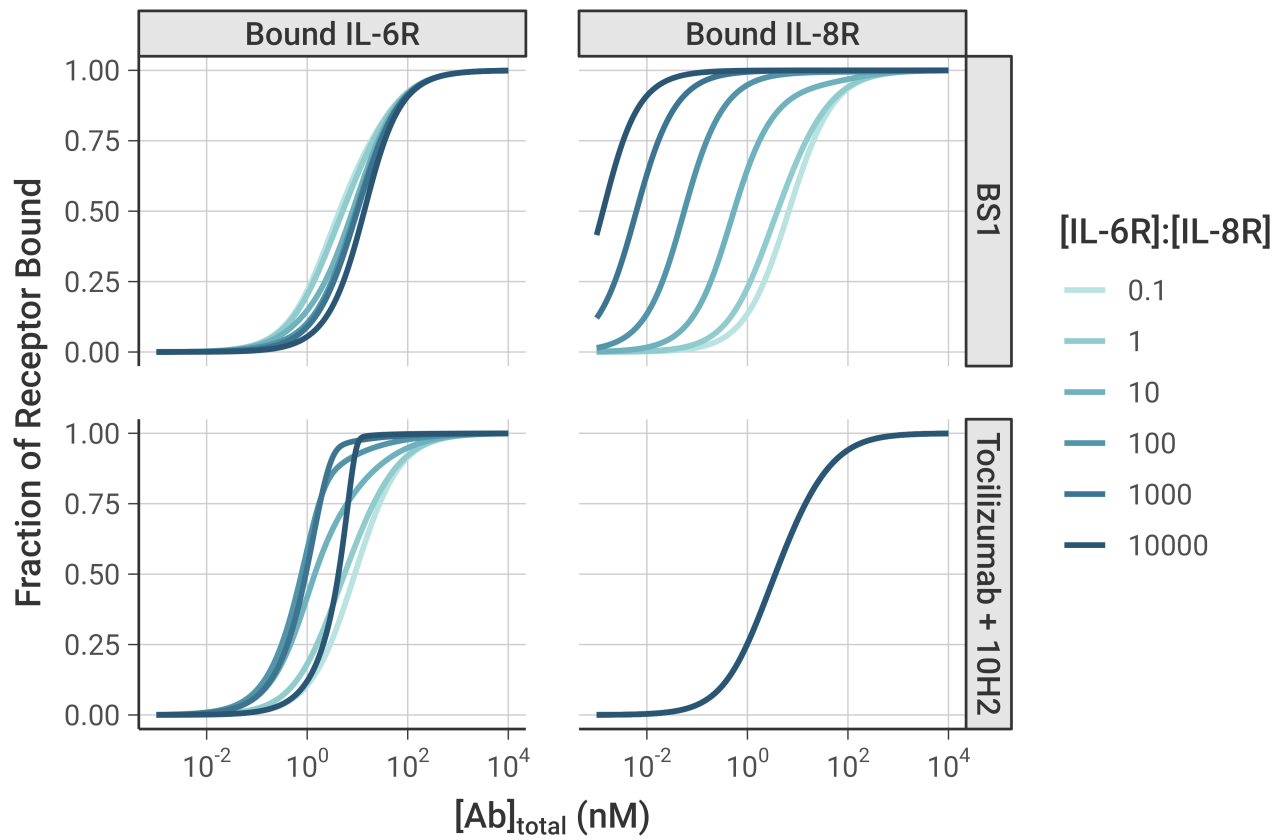

**S13 Fig.** The fractional occupancy of each receptor individually when one receptor (IL-6R) is in excess. IL-8R was fixed at  $10^3$  receptors/cell for these simulations, while IL-6R ranged from  $10^2$  to  $10^7$  receptors/cell. The fractional occupancy indicates the fraction of the specific receptor concentration (either IL-6R or IL-8R) that is bound to antibody (either BS1 or the combination of tocilizumab and 10H2). The fractional occupancy when IL-6R was fixed and IL-8R was in excess was shown in the main text [Fig 7]
